# Supplementary material for: Through-bond homonuclear correlation experiments in solid-state NMR applied to quadrupolar nuclei in Al–O–P–O–Al chains
Source: Royal Society of Chemistry journal article supplement (doi:10.1039/b600514d), 2006-01-01
Supplement: b600514d.pdf [file b600514d.pdf]

## Supplementary Materials

### 1) Pulse sequence

```
#include <Avance.incl>
#include <Delay.incl>

"p5=p1*2"
"p12=p11*2"
"d0=0u"
"d6=(16)*(1s/cnst31)-(p1)"
"d8=(18)*(1s/cnst31)-(p1)"
"d7=(16-116)*(1s/cnst31)-(p1)"
"d3=(13)*(1s/cnst31)"
"d11=30m"

1 ze
  d11 p13:f3
2 d1
  ; optional DFS enhancement
#ifdef dfs
  (p2:sp1 ph10):f1
  100u
#endif
  (p1 ph1)
  (center (d0) (p12 ph1):f3 )
  ; FIRST INEPT TRANSFER
  d6
  (center (p5 ph2) (p12 ph5):f3 )
  d6
  (p1 ph3)
  ; Z FILTER
  d3
  (p11 ph6):f3
  ; ECHO for the conversion of I1zSy into I2zSy
  d8
  (center (p5 ph2) (p12 ph5):f3)
  d8
  ;SECOND INEPT TRANSFER
  (p11 ph7):f3
  d3
  (p1 ph4)
  d6
  (center (p5 ph2) (p12 ph5):f3)
;OPTIONAL ACQUISITION OF THE WHOLE ECHO
#ifdef top
  d7
#endif
  go=2 ph31
  30m mc #0 to 2 F1PH(ip1, id0)
exit

ph1= 0
ph2= {0}*8 {2}*8
ph3= 1
```

```

ph6= 0 2
ph5= 0 0 0 0 2 2 2 2
ph4= 1
ph7= 0 0 2 2
ph31= 0 2 2 0
ph11=1
#ifdef dfs
ph10=0
#endif

;p11 : f1 channel - power level for pulse (default)
;p13 : f3 channel - power level for pulse (default)
;p1 : f1 channel - 90 degree high power pulse
;p5 : f1 channel - 180 degree high power pulse
;p2 : dfs
;p11 : f3 channel - 90 degree high power pulse
;p12 : f3 channel - 180 degree high power pulse
;d0 : incremented delay (2D) [3 usec]
;d1 : relaxation delay; 1-5 * T1
;d6 : INEPT transfer
;d7 : INEPT transfer
;d8 : REFOCUSING DELAY
;nd0: 1
;FnMODE: States

```

## 2) Notes

Provided the 90°/180° pulses for nuclei I and S have been calibrated, the d6 and d8 delays (corresponding to  $\tau$  and  $\tau_2$ ) can be optimized:

First, d8/18 is set to a very small value (i.e. 3 $\mu$ s), in order to prevent the  $I_z^1 S_y \rightarrow I_z^2 S_y$  conversion. The INEPT delay d6 is optimized to generate the highest observable signal. Then d8 is optimized in order to maximize the  $I_z^1 S_y \rightarrow I_z^2 S_y$  transfer.
